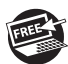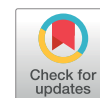

COMMENT ON BLOOMGARDEN ET AL.

# Is HbA<sub>1c</sub> <7% a Marker of Poor Performance in Individuals >65 Years Old? Diabetes Care 2017;40:526–528

Diabetes Care 2017;40:e152–e153 | <https://doi.org/10.2337/dc17-0893>

Leonard M. Pogach<sup>1</sup> and  
David C. Aron<sup>2,3</sup>

Bloomgarden et al. (1) make four claims in their counterpoint to our proposal (2): 1) we confounded hypoglycemia with “good” glycemic control; 2) “good” glycemic control benefits all older adults, even those with serious comorbidities, making our measure harmful; 3) effects of anemia and kidney disease on HbA<sub>1c</sub> invalidate the measure; 4) newer drugs make this issue moot. We disagree.

First, serious hypoglycemia is a limiting factor in diabetes treatment, especially with insulin. Its prevention has been identified as a public health issue by the Department of Health and Human Services (3). It has been recommended that the current HbA<sub>1c</sub> <8% performance measure applicable to older adults be “revisited” to stratify by medication, include comorbid conditions, and incorporate a balancing measure of <7%. Our measure is consistent with each recommendation.

Second, the authors (1) and the American Association of Clinical Endocrinologists state that HbA<sub>1c</sub> <7% is “currently considered evidence of appropriate treatment.” In contrast, our article noted that the American Geriatrics Society, American Diabetes Association, Department of Veterans Affairs/Department of Defense, and Indian Health Service all recommend tiered glycemic target values <8% or even higher for older adults with significant comorbid conditions, especially those at high risk for hypoglycemia.

Bloomgarden et al. (1) state that our measure would result in progression of microvascular complications for many patients. To the contrary, using our sequential approach to building the denominator, no seniors without high-risk conditions would be included in the denominator. All patients with cardiovascular disease had at least one other serious condition. The advanced diabetes category only included patients with advanced eye disease—primarily proliferative retinopathy and vitreous hemorrhage.

Third, although anemia does result in lower HbA<sub>1c</sub>, the impact is relatively small; a concentration of 6.4% HbA<sub>1c</sub> at a hemoglobin concentration of 100 g/L would correspond to a concentration of 6.53% HbA<sub>1c</sub> at a hemoglobin concentration of 140 g/L. Similarly, stage 3B or 4 chronic kidney disease could decrease the percentage of patients marginally above 7.0%. However, the population prevalence of chronic kidney disease is 18.6% in patients with diabetes ≥65 years of age (4), comparable to our study. More importantly, African Americans have higher HbA<sub>1c</sub> values for any level of glycemic control, leading the American Diabetes Association to recommend that race can be considered in individualizing glycemic targets. It has been proposed that treating to an HbA<sub>1c</sub> target may result in higher rates of serious hypoglycemic events among African Americans (5). Additionally, we noted that the

acceptable variability of a single HbA<sub>1c</sub> test is considerable. Establishing an individualized target range that avoids the extremes of care accommodates the issues.

Finally, although newer agents may decrease prescription of oral hypoglycemic-prone agents (cost considerations aside), many older adults will benefit from the use of insulin. Moreover, polypharmacy itself has risks. In contrast to established measures, our measure attempts to balance benefits and harms. The need for a medication safety measure addressing both over- and undertreatment is consistent with the modern Hippocratic oath: “I will apply, for the benefit of the sick, all measures which are required, avoiding those twin traps of overtreatment and therapeutic nihilism” (6).

**Funding.** The work was supported by grants from the Veterans Health Administration Health Services Research and Development Service and its Quality Enhancement Research Initiative to L.M.P. (RRP-12-492) and D.C.A. (SCE 12-181) and to Dr. Chin-Lin Tseng of VA New Jersey Health Care System (IIR 11-077).

The opinions expressed are solely those of the authors and do not represent the views of the Department of Veterans Affairs.

**Duality of Interest.** No potential conflicts of interest relevant to this article were reported.

## References

1. Bloomgarden ZT, Einhorn D, Handelsman Y. Is HbA<sub>1c</sub> <7% a marker of poor performance in individuals >65 years old? Diabetes Care 2017;40:526–528

<sup>1</sup>Office of Specialty Care Services, Department of Veterans Affairs, Washington, DC

<sup>2</sup>Louis Stokes Cleveland Department of Veterans Affairs Medical Center, Cleveland, OH

<sup>3</sup>Case Western Reserve University School of Medicine, Cleveland, OH

Corresponding author: David C. Aron, [david.aron@va.gov](mailto:david.aron@va.gov).

© 2017 by the American Diabetes Association. Readers may use this article as long as the work is properly cited, the use is educational and not for profit, and the work is not altered. More information is available at <http://www.diabetesjournals.org/content/license>.

2. Pogach L, Tseng C-L, Soroka O, Maney M, Aron D. A proposal for an out-of-range glycemic population health safety measure for older adults with diabetes. *Diabetes Care* 2017;40:518–525
3. Office of Disease Prevention and Health Promotion. National action plan for adverse drug event prevention [Internet], 2014. Washington, DC, U.S. Department of Health and Human Services. Available from <https://health.gov/hcq/pdfs/ade-action-plan-508c.pdf> Accessed 28 July 2017
4. Bailey RA, Wang Y, Zhu V, Rupnow MFT. Chronic kidney disease in US adults with type 2 diabetes: an updated national estimate of prevalence based on Kidney Disease: Improving Global Outcomes (KDIGO) staging. *BMC Res Notes* 2014;7:415
5. Herman WH. Are there clinical implications of racial differences in HbA<sub>1c</sub>? Yes, to not consider can do great harm! *Diabetes Care* 2016;39:1458–1461
6. Tyson P. The Hippocratic oath today [article online]. Available from [www.pbs.org/wgbh/nova/body/hippocratic-oath-today.html](http://www.pbs.org/wgbh/nova/body/hippocratic-oath-today.html). Accessed 17 August 2017
